# Supplementary material for: Visualization of SARS-CoV-2 particles in naso/oropharyngeal swabs by thin section electron microscopy
Source: Springer Nature journal article supplement (doi:10.1186/s12985-023-01981-9), 2023-02-06
Supplement: MOESM2 [file 23997582]

**Table S1.** Stepwise protocol for embedding in epoxy resin (Laue 2010)

| Step | Solution/Mixture/Solvent                                  | Duration of incubation [min] | Temperature | Tissue processor |
|------|-----------------------------------------------------------|------------------------------|-------------|------------------|
| 1    | HEPES buffer, 0.05 M                                      | 5                            | RT          | no               |
| 2    | HEPES buffer, 0.05 M                                      | 5                            | RT          | no               |
| 3    | HEPES buffer, 0.05 M                                      | 5                            | RT          | no               |
| 4    | Osmium tetroxide, 1% in water                             | 60                           | RT          | no               |
| 5    | Distilled water                                           | 5                            | RT          | no               |
| 6    | Distilled water                                           | 5                            | RT          | no               |
| 7    | Distilled water                                           | 5                            | RT          | no               |
| 8    | Tannic acid, 0.1% in 0.05 M HEPES buffer                  | 30                           | RT          | yes              |
| 9    | Na <sub>2</sub> SO <sub>4</sub> 1% in 0.05 M HEPES buffer | 10                           | RT          | yes              |
| 10   | Na <sub>2</sub> SO <sub>4</sub> 1% in 0.05 M HEPES buffer | 10                           | RT          | yes              |
| 11   | Distilled water                                           | 10                           | RT          | yes              |
| 12   | Distilled water                                           | 10                           | RT          | yes              |
| 13   | Distilled water                                           | 10                           | RT          | yes              |
| 14   | Uranyl acetate, 2% in distilled water                     | 120                          | RT          | yes              |
| 15   | Ethanol, 30%                                              | 30                           | RT          | yes              |
| 16   | Ethanol, 50%                                              | 30                           | RT          | yes              |
| 17   | Ethanol, 70%                                              | 30                           | RT          | yes              |
| 18   | Ethanol, 95%                                              | 60                           | RT          | yes              |
| 19   | Ethanol, abs.                                             | 60                           | RT          | yes              |
| 20   | Ethanol, abs.                                             | 60                           | RT          | yes              |
| 21   | Propylene oxide                                           | 30                           | RT          | yes              |
| 22   | Propylene oxide                                           | 30                           | RT          | yes              |

|    |                                           |        |       |     |
|----|-------------------------------------------|--------|-------|-----|
| 23 | Propylene oxide / Epon 2+1                | 180    | RT    | yes |
| 24 | Propylene oxide / Epon 1+1                | 180    | RT    | yes |
| 25 | Propylene oxide / Epon 1+3                | 180    | RT    | yes |
| 26 | Epon                                      | 120    | RT    | yes |
| 27 | Epon                                      | 180    | RT    | yes |
| 28 | Epon                                      | 240    | RT    | no  |
| 29 | Epon - final embedding in silicone moulds | -      | RT    | no  |
| 30 | Polymerization                            | 2 days | 60 °C | no  |

---

Tissue processor = Leica EM TP (Leica Microsystems)

### References

Laue, M. Electron microscopy of viruses. *Method. Cell Biol.* **96**, 1-20 (2010).
