# Supplementary material for: Visualization of SARS-CoV-2 particles in naso/oropharyngeal swabs by thin section electron microscopy
Source: Springer Nature journal article supplement (doi:10.1186/s12985-023-01981-9), 2023-02-06
Supplement: MOESM3 [file 23997582]

**Table S2.** Stepwise protocol for rapid embedding in LR White resin (Laue 2010)

| Step | Solution/Mixture/Solvent                                                                         | Duration of incubation [min] | Temperature |
|------|--------------------------------------------------------------------------------------------------|------------------------------|-------------|
| 1    | HEPES buffer, 0.05 M                                                                             | 5                            | RT          |
| 2    | HEPES buffer, 0.05 M                                                                             | 5                            | RT          |
| 3    | Osmium tetroxide, 1% in water                                                                    | 30                           | RT          |
| 5    | Distilled water                                                                                  | 2                            | RT          |
| 6    | Distilled water                                                                                  | 2                            | RT          |
| 15   | Ethanol, 70%                                                                                     | 5                            | ice         |
| 17   | Ethanol, 100%                                                                                    | 5                            | ice         |
| 18   | Ethanol, 100%                                                                                    | 5                            | ice         |
| 19   | LR White / Ethanol (100%) 1+1                                                                    | 5                            | ice         |
| 20   | LR White                                                                                         | 5                            | ice         |
| 21   | LR White                                                                                         | 10                           | ice         |
| 22   | LR White with 5 $\mu$ l accelerator/ml in airfuge vials; transfer of samples for final embedding | -                            | ice         |
| 23   | Polymerization                                                                                   | 60                           | ice         |
| 24   | Polymerization                                                                                   | 10                           | 60°         |

## References

Laue, M. Electron microscopy of viruses. *Method. Cell Biol.* **96**, 1-20 (2010).
